# Supplementary material
Source: publisher site journal article supplement (https://www.spandidos-publications.com/4748/downloadSupplementary)
Supplement: Supplementary file 1 [file downloadSupplementary]

Table SI. Association of subsequent bladder recurrence post radical nephroureterectomy with interrelated NLR and renal function.

| eGFR status groups and cut-off values of NLR | P-value |
|----------------------------------------------|---------|
| <b>NLR in eGFR <math>\geq 60</math></b>      |         |
| >3.0 vs. <3.0                                | 0.776   |
| >3.5 vs. <3.5                                | 0.595   |
| >3.8 vs. <3.8                                | 0.462   |
| >4.0 vs. <4.0                                | 0.570   |
| <b>NLR in eGFR &lt;60</b>                    |         |
| >3.0 vs. <3.0                                | 0.739   |
| >3.5 vs. <3.5                                | 0.362   |
| >3.8 vs. <3.8                                | 0.256   |
| >4.0 vs. <4.0                                | 0.353   |
| <b>NLR in eGFR <math>\geq 45</math></b>      |         |
| >3.0 vs. <3.0                                | 0.650   |
| >3.5 vs. <3.5                                | 0.232   |
| >3.8 vs. <3.8                                | 0.163   |
| >4.0 vs. <4.0                                | 0.203   |
| <b>NLR in eGFR &lt;45</b>                    |         |
| >3.0 vs. <3.0                                | 0.578   |
| >3.5 vs. <3.5                                | 0.162   |
| >3.8 vs. <3.8                                | 0.045   |
| >4.0 vs. <4.0                                | 0.077   |

Kaplan-Meier analysis of intravesical recurrence-free survival based on the different cut-off values of NLR when stratifying patients into four subgroups as eGFR  $\geq 60$ , <60,  $\geq 45$  and <45 according to the distinct renal function levels. eGFR, estimated glomerular filtration rate; NLR, neutrophil-to-lymphocyte ratio.
